# Supplementary material for: Prevalence of Depression Among U.S. Adults With Diabetes
Source: Oxford University Press journal article supplement (doi:10.2337/dc07-1154), 2007-12-28
Supplement: dc071154onlineappendix.doc [file dc071154onlineappendix.doc]

**APPENDIX**

**The PHQ-8 questionnaire implemented in the 2006 BRFSS**

Now, I am going to ask you some questions about your mood.  When answering these questions, please think about how many days each of the following has occurred in the past 2 weeks.

1. “Over the last 2 weeks, how many days have you had little interest or pleasure in doing things?”
2. “Over the last 2 weeks, how many days have you felt down, depressed or hopeless?”
3. “Over the last 2 weeks, how many days have you had trouble falling asleep or staying asleep or sleeping too much?”
4. “Over the last 2 weeks, how many days have you felt tired or had little energy?”
5. “Over the last 2 weeks, how many days have you had a poor appetite or ate too much?”
6. “Over the last 2 weeks, how many days have you felt bad about yourself – or that you were a failure or had let yourself or your family down?”
7. “Over the last 2 weeks, how many days have you had trouble concentrating on things, such as reading the newspaper or watching TV?”
8. “Over the last 2 weeks, how many days have you moved or spoken so slowly that other people could have noticed? Or the opposite –being so fidgety or restless that you were moving around a lot more than usual?”

(Response of question 1 to 8: _ _ 01-14 days, 88 none, 77 don’t know/not sure, 99 refused)
